# Supplementary figures and images for: TBP/TFIID-dependent activation of MyoD target genes in skeletal muscle cells
Source: eLife journal article supplement (doi:10.7554/elife.12534), 2016-02-11

Mouse Skeletal Muscle Myoblasts C2C12

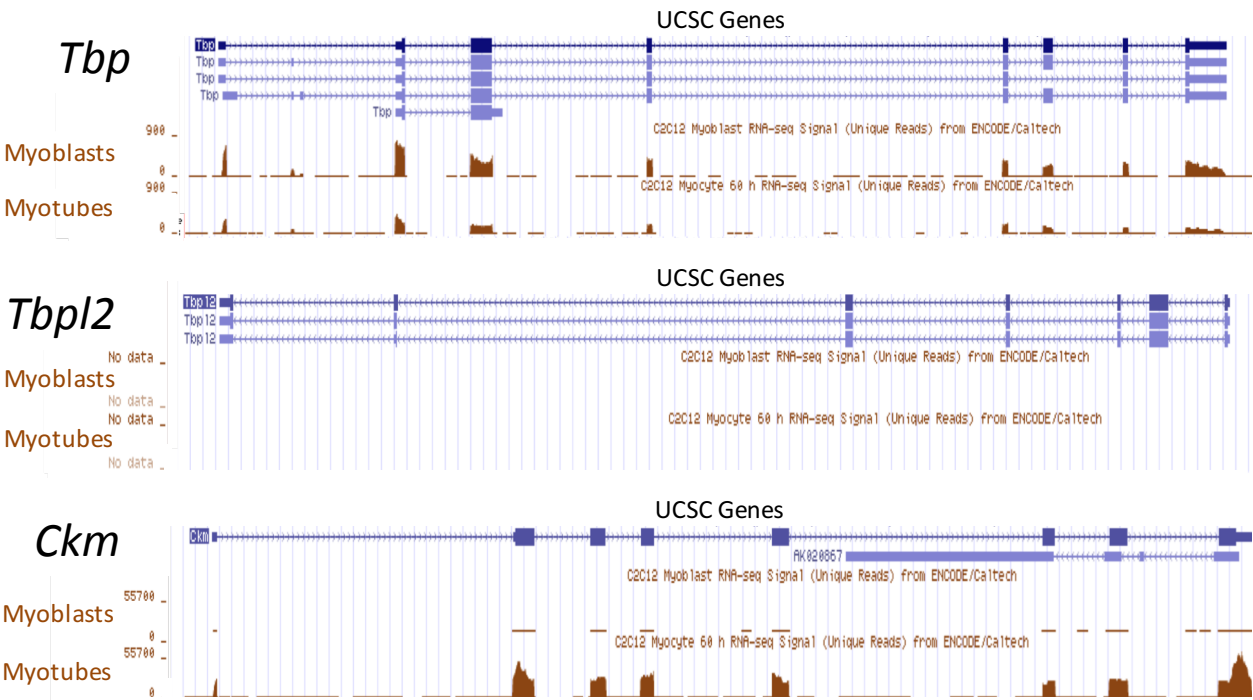

Human fibroblasts IMR90 Overexpressing MYOD

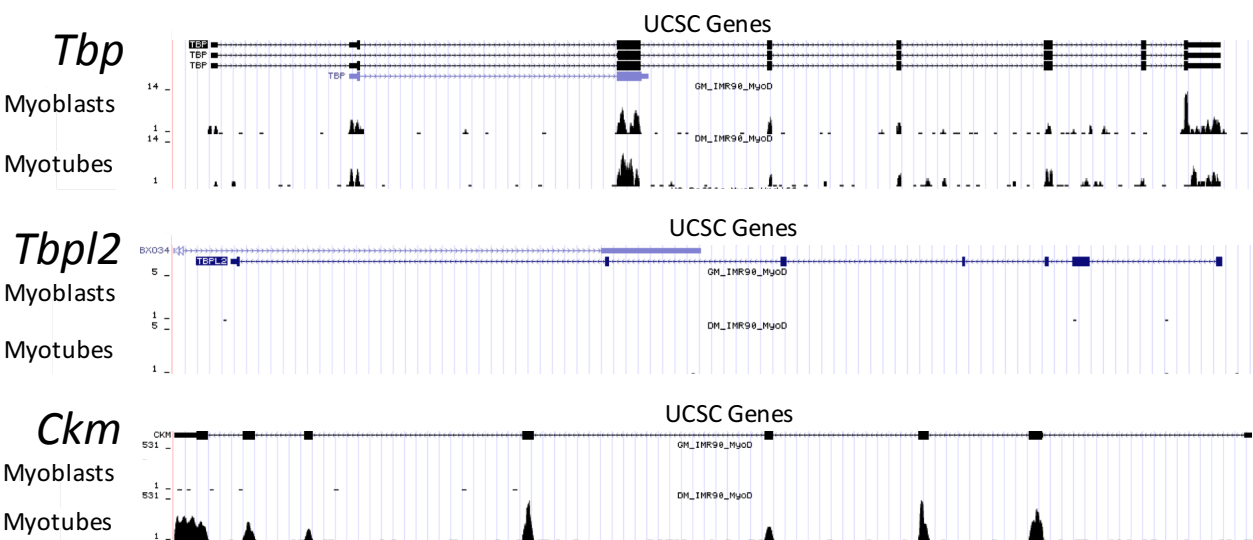

Supplement: supp [file elife_poa_e12534_Figure_2_figure_supplement.pdf › elife_poa_e12534_Figure_2_figure_supplement.pdf]

**A: C2C12**

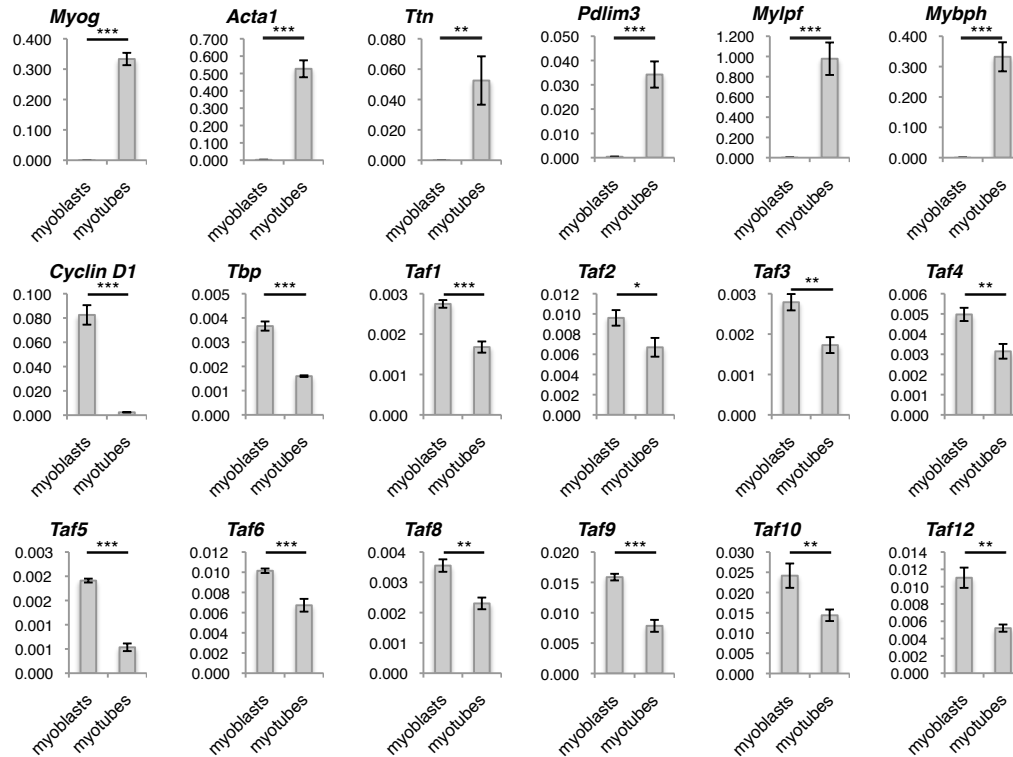

**B: Satellite cells**

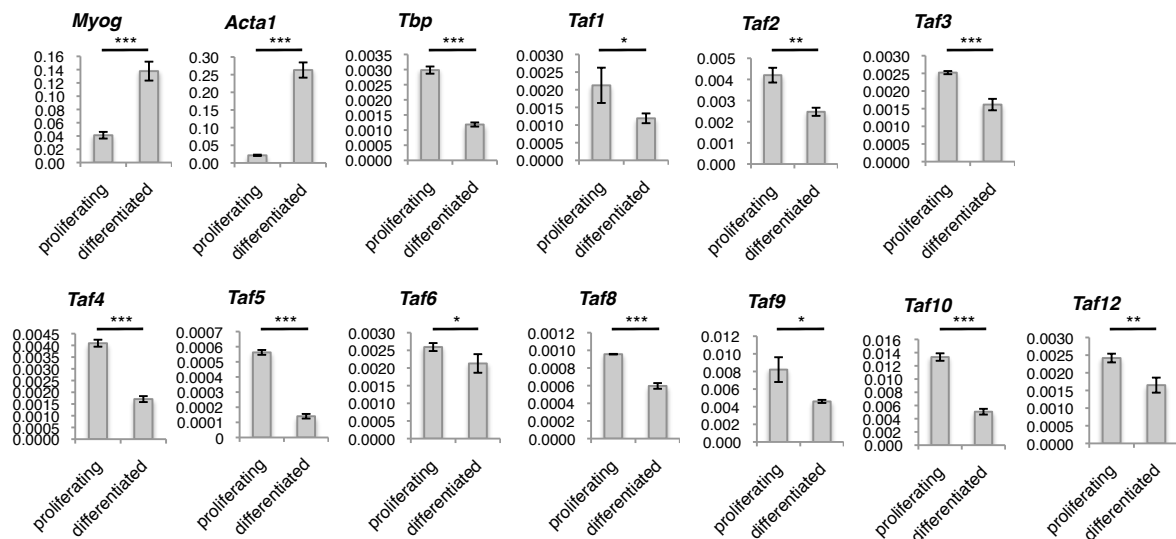

Supplement: supp [file elife_poa_e12534_Figure_4_figure_supplement.pdf › elife_poa_e12534_Figure_4_figure_supplement.pdf]
